# Supplementary material for: Study of the electrochemical betanidin oxidation path using computational methods
Source: Royal Society of Chemistry journal article supplement (doi:10.1039/d2cp02053j), 2022-01-01
Supplement: d2cp02053j1.xlsx [file d2cp02053j1.xlsx]

## Sheet: OxidationI pH=0
B3LYP/6-31+G(d,p)/SMD multi explicit water molecules
		Gaq										Termodinamic constants
	Compound	au	kcal/mol		Reaction	pKa	E°ox (SHE)	E°ox (Ag/AgCl)
	1	-1865.79	-1.1708e+06									R	0.00198588
	12+.	-1865.61	-1.17069e+06		1 --> 12+. + e-		0.642404	0.445404				T	298.15
	13+	-1865.4	-1.17056e+06		12+.--> 13+ + e-		1.26873	1.07173				ΔG(aq)H+	-270.29
DESDE C5-OH	1+.	-1865.18	-1.17042e+06		12+.--> 1+. + H+	-1.10884						SHE	4.281
	12+	-1864.99	-1.1703e+06		13+--> 12+ + H+	-10.9385						F	23.0604
	2.	-1864.73	-1.17014e+06		1+.--> 12+ + e-		0.687493	0.490493				Ggas e	-0.867
	2	-1864.56	-1.17003e+06		1+.--> 2. + H+	7.725						1/2.303RT	0.733362
					12+--> 2 + H+	3.73054						(atm->m/l)	1.89
					2.--> 2 + e-		0.451297	0.254297				Ggas e/F	-0.037597
												SHE+G(e-)	4.3186
					1--> 1+. + e- + H+		0.576837	0.379837				SHE -> Ag/AgCl	0.197
					1+.--> 2 + e- + H+		0.908084	0.711084
					1--> 2 + 2e- + 2H+		0.74246	0.54546
					1--> 12+ + 2e- + H+		0.632165	0.435165
B3LYP/6-31+G(d,p)/SMD
		Gaq
	Compound	au	kcal/mol		Reaction	pKa	E°ox (SHE)	E°ox (Ag/AgCl)
	1	-1407.18	-883020
	12+.	-1406.99	-882897		1 --> 12+. + e-		0.997814	0.800814
	13+	-1406.76	-882758		12+.--> 13+ + e-		1.71054	1.51354
DESDE C5-OH	1+.	-1406.56	-882631		12+.--> 1+. + H+	-3.09549
	12+	-1406.37	-882511		13+--> 12+ + H+	-17.3964
	2.	-1406.12	-882352		1+.--> 12+ + e-		0.864913	0.667913
	2	-1405.94	-882240		1+.--> 1. + H+	6.4604
					12+--> 2 + H+	1.22203
					2.--> 2 + e-		0.555163	0.358163
					1--> 1+. + e- + H+		0.814775	0.617775
					1+.--> 12 + e- + H+		0.937173	0.740173
					1--> 12 + 2e- + 2H+		0.875974	0.678974
					1--> 12+ + 2e- + H+		0.839844	0.642844

## Sheet: OxidationIII pH=1.6
B3LYP/6-31+G(d,p)/SMD multi explicit water molecules
		Gaq										Termodinamic constants
	Compound	au	kcal/mol		Reaction	pKa	E°ox (SHE)	E°ox (Ag/AgCl)
	C17	-1865.35	-1.17053e+06									R	0.00198588
	C17+.	-1865.18	-1.17042e+06		C17 --> C17+. + e-		0.524496	0.327496				T	298.15
	C172+	-1864.97	-1.17029e+06		C17+.--> C172+ + e-		1.21962	1.02262				ΔG(aq)H+	-270.29
DESDE C5-OH	C17.	-1864.74	-1.17014e+06		C17+.--> C17. + H+	1.25747						SHE	4.281
	C17+	-1864.56	-1.17003e+06		C172+--> C17+ + H+	-9.16634						F	23.0604
	C17DC.-	-1864.3	-1.16986e+06		C17.--> C17+ + e-		0.603246	0.406246				Ggas e	-0.867
	C17DC	-1864.12	-1.16975e+06		C17.--> C17.- + H+	7.19993						1/2.303RT	0.733362
					C17+--> C17Q + H+	4.66013						(atm->m/l)	1.89
					C17.---> C17Q + e-		0.453065	0.256065				Ggas e/F	-0.037597
												SHE+G(e-)	4.3186
				E°ox1 < E°ox2	C17--> C17. + e- + H+		0.598851	0.401851				SHE -> Ag/AgCl	0.197
					C17.--> C17DC + e- + H+		0.878804	0.681804
					C17--> C17DC + 2e- + 2H+		0.738828	0.541828
B3LYP/6-31+G(d,p)/SMD
		Gaq
	Compound	au	kcal/mol		Reaction	pKa	E°ox (SHE)	E°ox (Ag/AgCl)
	C17	-1406.75	-882748
	C17+.	-1406.56	-882630		C17 --> C17+. + e-		0.773645	0.576645
	C172+	-1406.34	-882494		C17+.--> C172+ + e-		1.60507	1.40807
DESDE C5-OH	C17.	-1406.13	-882362		C17+.--> C17. + H+	-0.996552
	C17+	-1405.95	-882245		C172+--> C17+ + H+	-15.5372
	C17DC.-	-1405.68	-882077		C17.--> C17+ + e-		0.745264	0.548264
	C17DC	-1405.5	-881966		C17.--> C17.- + H+	10.361
					C17+--> 2C17 + H+	6.0881
					C17.---> 2C17 + e-		0.492604	0.295604
					C17--> C17+. + e- + H+		0.714718	0.517718
					C17+.--> C17DC + e- + H+		1.10526	0.908259
				E°ox1 > E°ox2	C17--> C17DC + 2e- + 2H+		0.909989	0.712989

## Sheet: Oxidation III pH=4
B3LYP/6-31+G(d,p)/SMD multi explicit water molecules
		Gaq										Termodinamic constants
	Compound	au	kcal/mol		Reaction	pKa	E°ox (SHE)	E°ox (Ag/AgCl)
	C172	-1864.91	-1.17025e+06									R	0.00198588
	C172.	-1864.74	-1.17014e+06		C172 --> C172. + e-		0.425092	0.228092				T	298.15
	C172+	-1864.54	-1.17002e+06		C172.--> C172+ + e-		1.10712	0.910123				ΔG(aq)H+	-270.29
DESDE C5-OH	C172.-	-1864.3	-1.16987e+06		C172.--> C172.- + H+	2.49907						SHE	4.281
	C1720	-1864.13	-1.16976e+06		C172+--> C1720 + H+	-8.26022						F	23.0604
	C172DC.2-	-1863.85	-1.16959e+06		C172.---> C1720 + e-		0.470916	0.273916				Ggas e	-0.867
	C172DC	-1863.68	-1.16948e+06		C172.---> C172.2- + H+	8.51101						1/2.303RT	0.733362
					C1720--> C172DC + H+	6.01953						(atm->m/l)	1.89
					C172.2---> C172Q + e-		0.323593	0.126593				Ggas e/F	-0.037597
												SHE+G(e-)	4.3186
				E°ox1 < E°ox2	C172--> C172.- + e- + H+		0.572864	0.375864				SHE -> Ag/AgCl	0.197
				pKa	C172.---> C172DC + e- + H+		0.826857	0.629857
					C172--> C172DC + 2e- + 2H+		0.699861	0.502861
B3LYP/6-31+G(d,p)/SMD
		Gaq
	Compound	au	kcal/mol		Reaction	pKa	E°ox (SHE)	E°ox (Ag/AgCl)
	C172	-1406.31	-882474
	C172.	-1406.13	-882359		C172 --> C172. + e-		0.645724	0.448724
	C172+	-1405.92	-882227		C172.--> C172+ + e-		1.41244	1.21544
DESDE C5-OH	C172.-	-1405.7	-882088		C172.--> C172.- + H+	0.872747
	C1720	-1405.51	-881974		C172+--> C1720 + H+	-12.6624
	C172DC.2-	-1405.24	-881801		C172.---> C1720 + e-		0.61209	0.41509
	C172DC	-1405.07	-881694		C172.---> C172.2- + H+	12.1935
					C1720--> 2C172 + H+	7.02781
					2C172.2---> 2C172 + e-		0.30664	0.10964
					C172--> C172.- + e- + H+		0.69733	0.50033
					C172.---> C172DC + e- + H+		1.02765	0.830652
				E°ox1 > E°ox2	C172--> C172DC + 2e- + 2H+		0.862491	0.665491
B3LYP/6-31+G(d,p)/SMD multi explicit water molecules
		Gaq
	Compound	au	kcal/mol		Reaction	pKa	E°ox (SHE)	E°ox (Ag/AgCl)
	C1715	-1864.91	-1.17025e+06
	C1715.	-1864.74	-1.17014e+06		C1715 --> C1715. + e-		0.460685	0.263685
	C1715+	-1864.53	-1.17001e+06		C1715.--> C1715+ + e-		1.2422	1.0452
DESDE C5-OH	C1715.-	-1864.3	-1.16987e+06		C1715.--> C1715.- + H+	2.26989
	C17150	-1864.13	-1.16976e+06		C1715+--> C17150 + H+	-10.8852
	C1715DC.2-	-1863.85	-1.16958e+06		C1715.---> C17150 + e-		0.464331	0.267331
	C1715DC	-1863.68	-1.16948e+06		C1715.---> C1715.2- + H+	9.75215
					C17150--> C1715Q + H+	7.7135
					C1715.2---> C1715Q + e-		0.343784	0.146784
				E°ox1 = E°ox2	C1715--> C1715.- + e- + H+		0.594905	0.397905
				pKa	C1715.---> C1715DC + e- + H+		0.920438	0.723438
					C1715--> C1715DC + 2e- + 2H+		0.757672	0.560672
B3LYP/6-31+G(d,p)/SMD
		Gaq
	Compound	au	kcal/mol		Reaction	pKa	E°ox (SHE)	E°ox (Ag/AgCl)
	C1715	-1406.31	-882473
	C1715.	-1406.13	-882358		C1715 --> C1715. + e-		0.653697	0.456697
	C1715+	-1405.91	-882224		C1715.--> C1715+ + e-		1.5187	1.3217
DESDE C5-OH	C1715.-	-1405.7	-882087		C1715.--> C1715.- + H+	0.535426
	C17150	-1405.51	-881973		C1715+--> C17150 + H+	-14.2584
	C1715DC.2-	-1405.23	-881797		C1715.---> C17150 + e-		0.643928	0.446928
	C1715DC	-1405.06	-881688		C1715.---> C1715.2- + H+	14.4493
					C17150--> C1715Q + H+	10.8953
					C1715.2---> C1715Q + e-		0.433772	0.236772
					C1715--> C1715.- + e- + H+		0.685357	0.488357
					C1715.---> C1715DC + e- + H+		1.28818	1.09118
				E°ox1 = E°ox2	C1715--> C1715DC + 2e- + 2H+		0.986766	0.789766

## Sheet: Oxidation III pH=5
B3LYP/6-31+G(d,p)/SMD multi explicit water molecules
		Gaq										Termodinamic constants
	Compound	au	kcal/mol		Reaction	pKa	E°ox (SHE)	E°ox (Ag/AgCl)
	C17215	-1864.47	-1.16998e+06									R	0.00198588
	C17215.-	-1864.3	-1.16987e+06		C17215 --> C17215.- + e-		0.338287	0.141287				T	298.15
	C172150	-1864.1	-1.16974e+06		C17215.---> C172150 + e-		1.15749	0.960492				ΔG(aq)H+	-270.29
DESDE C5-OH	C17215.2-	-1863.86	-1.16959e+06		C17215.---> C17215.2- + H+	3.79313						SHE	4.281
	C172151-	-1863.69	-1.16948e+06		C172150--> C172151- + H+	-10.0209						F	23.0604
	C17215DC.3-	-1863.41	-1.16931e+06		C17215.2---> C172151- + e-		0.340654	0.143654				Ggas e	-0.867
	C17215DC	-1863.24	-1.1692e+06		C17215.2---> C17215.3- + H+	10.0462						1/2.303RT	0.733362
					C172151---> C17215Q + H+	8.45119						(atm->m/l)	1.89
					C17215.3---> C17215Q + e-		0.246339	0.0493389				Ggas e/F	-0.037597
												SHE+G(e-)	4.3186
				E°ox1 = E°ox2	C17215--> C17215.2- + e- + H+		0.562578	0.365578				SHE -> Ag/AgCl	0.197
				pKa	C17215.2---> C17215DC + e- + H+		0.840381	0.643381
					C17215--> C17215DC + 2e- + 2H+		0.70148	0.50448
B3LYP/6-31+G(d,p)/SMD
		Gaq
	Compound	au	kcal/mol		Reaction	pKa	E°ox (SHE)	E°ox (Ag/AgCl)
	C17215	-1405.87	-882198
	C17215.-	-1405.69	-882085		C17215 --> C17215.- + e-		0.559925	0.362925
	C172150	-1405.49	-881955		C17215.---> C172150 + e-		1.32454	1.12754
DESDE C5-OH	C17215.2-	-1405.26	-881813		C17215.---> C17215.2- + H+	1.61596
	C172151-	-1405.08	-881701		C172150--> C172151- + H+	-11.9832
	C17215DC.3-	-1404.79	-881521		C17215.2---> C172151- + e-		0.520414	0.323414
	C17215DC	-1404.62	-881415		C17215.2---> C17215.3- + H+	16.0471
					C172151---> C17215Q + H+	11.3831
					C17215.3---> C17215Q + e-		0.244625	0.0476246
					C17215--> C17215.2- + e- + H+		0.655479	0.458479
					C17215.2---> C17215DC + e- + H+		1.19351	0.996506
				E°ox1 < E°ox2	C17215--> C17215DC + 2e- + 2H+		0.924492	0.727492

## Sheet: Oxidation III pH=8
B3LYP/6-31+G(d,p)/SMD multi explicit water molecules
		Gaq										Termodinamic constants
	Compound	au	kcal/mol		Reaction	pKa	E°ox (SHE)	E°ox (Ag/AgCl)
	C17215OH6	-1864.02	-1.16969e+06									R	0.00198588
	C17215OH6.2-	-1863.86	-1.16959e+06		C17215OH6 --> C17215OH6.2- + e-		-0.0348385	-0.231838				T	298.15
	C17215OH5.2-	-1863.86	-1.16959e+06		C17215OH5.2---> C17215OH5- + e-		0.346151	0.149151				ΔG(aq)H+	-270.29
	C17215OH5-	-1863.69	-1.16948e+06									SHE	4.281
DESDE C6-OH	C17215OH5DC.3-	-1863.41	-1.16931e+06		C17215.2---> C17215DC.3- + H+	10.1392						F	23.0604
	C17215DC	-1863.26	-1.16922e+06		C17215OH5---> C17215DC + H+	-1.18109						Ggas e	-0.867
												1/2.303RT	0.733362
												(atm->m/l)	1.89
												Ggas e/F	-0.037597
					C17215.3---> C17215Q + e-		-0.323227	-0.520227				SHE+G(e-)	4.3186
												SHE -> Ag/AgCl	0.197
				E°ox1 > E°ox2	C17215OH6--> C17215.3- + e- + H+		0.564701	0.367701
					C17215OH6--> C17215Q + 2e- + H+		0.120737	-0.0762632
B3LYP/6-31+G(d,p)/SMD
		Gaq
	Compound	au	kcal/mol		Reaction	pKa	E°ox (SHE)	E°ox (Ag/AgCl)
	C17215OH6	-1405.41	-881911
	C17215OH6.2-	-1405.26	-881813		C17215OH6 --> C17215.2- + e-		-0.0690163	-0.266016
	C17215OH5.2-	-1405.26	-881813		C17215OH5.2---> C17215OH5- + e-		0.516006	0.319006
	C17215OH5-	-1405.08	-881701
DESDE C6-OH	C17215OH5DC.3-	-1404.79	-881521		C17215OH5.2---> C17215OH5.3- + H+	15.9726
	C17215DC	-1404.66	-881435		C17215OH5---> C17215DC + H+	-3.29797
					C17215.3---> C17215Q + e-		-0.62348	-0.82048
					C17215OH6--> C17215.3- + e- + H+		0.875457	0.678457
				E°ox1 > E°ox2	C17215OH6--> C17215Q + 2e- + H+		0.125989	-0.0710113
