# Supplementary material for: Study of the electrochemical betanidin oxidation path using computational methods
Source: Royal Society of Chemistry journal article supplement (doi:10.1039/d2cp02053j), 2022-01-01
Supplement: d2cp02053j2.xlsx [file d2cp02053j2.xlsx]

## Sheet: OxidationIII pH=0
B3LYP/6-31+G(d,p)/SMD multi explicit water molecules
		Gaq										Termodinamic constants
	Compound	au	kcal/mol		Reaction	pKa	E°ox (SHE)	E°ox (Ag/AgCl)
	1	-1865.79	-1.1708e+06									R	0.00198588
	12+.	-1865.61	-1.17069e+06		1 --> 12+. + e-		0.642404	0.445404				T	298.15
	13+	-1865.4	-1.17056e+06		12+.--> 13+ + e-		1.26873	1.07173				ΔG(aq)H+	-270.29
DESDE C6-OH	1+.	-1865.18	-1.17042e+06		12+.--> 1+. + H+	0.23308						SHE	4.281
	12+	-1864.99	-1.1703e+06		13+--> 12+ + H+	-6.67348						F	23.0604
	C3.	-1864.72	-1.17013e+06		1+.--> 12+ + e-		0.860341	0.663341				Ggas e	-0.867
	5	-1864.58	-1.17004e+06		1+.--> C3. + H+	9.8833						1/2.303RT	0.733362
					12+--> 5 + H+	-11.529						(atm->m/l)	1.89
					C3.--> 5 + e-		-0.405787	-0.602787				Ggas e/F	-0.037597
												SHE+G(e-)	4.3186
					1--> 1+. + e- + H+		0.656186	0.459186				SHE -> Ag/AgCl	0.197
					1+.--> 5 + e- + H+		0.178622	-0.0183775
					1--> 5 + 2e- + 2H+		0.417404	0.220404
B3LYP/6-31+G(d,p)/SMD
		Gaq
	Compound	au	kcal/mol		Reaction	pKa	E°ox (SHE)	E°ox (Ag/AgCl)
	1	-1407.18	-883020
	12+.	-1406.99	-882897		1 --> 12+. + e-		0.997814	0.800814
	13+	-1406.76	-882758		12+.--> 13+ + e-		1.71054	1.51354
DESDE C6-OH	1+.	-1406.56	-882631		12+.--> 1+. + H+	-3.35596
	12+	-1406.36	-882506		13+--> 12+ + H+	-13.4576
	C3.	-1406.12	-882354		1+.--> 12+ + e-		1.11322	0.916219
	5	-1405.97	-882257		1+.--> C3. + H+	5.1332
					12+--> 5 + H+	-15.7195
					C3.--> 5 + e-		-0.11982	-0.31682
					1--> 1+. + e- + H+		0.799373	0.602373
					1+.--> 5 + e- + H+		0.183711	-0.0132889
					1--> 5 + 2e- + 2H+		0.491542	0.294542

## Sheet: OxidationIII pH=1.6
B3LYP/6-31+G(d,p)/SMD multi explicit water molecules
		Gaq										Termodinamic constants
	Compound	au	kcal/mol		Reaction	pKa	E°ox (SHE)	E°ox (Ag/AgCl)
	C17	-1865.35	-1.17053e+06									R	0.00198588
	C17+.	-1865.18	-1.17042e+06		C17 --> C17+. + e-		0.524496	0.327496				T	298.15
	C172+	-1864.97	-1.17029e+06		C17+.--> C172+ + e-		1.21962	1.02262				ΔG(aq)H+	-270.29
DESDE C6-OH	C17.	-1864.74	-1.17014e+06		C17+.--> C17. + H+	1.84927						SHE	4.281
	C17+	-1864.55	-1.17003e+06		C172+--> C17+ + H+	-6.01633						F	23.0604
	C17C3.-	-1864.28	-1.16985e+06		C17.--> C17+ + e-		0.754516	0.557516				Ggas e	-0.867
	C17QM	-1864.15	-1.16977e+06		C17.--> C17C3.- + H+	13.944						1/2.303RT	0.733362
					C17+--> C17QM + H+	-11.2616						(atm->m/l)	1.89
					C17C3.---> C17QM + e-		-0.735918	-0.932918				Ggas e/F	-0.037597
												SHE+G(e-)	4.3186
				E°ox1 < E°ox2	C17--> C17+. + e- + H+		0.633845	0.436845				SHE -> Ag/AgCl	0.197
					C17+.--> C17QM + e- + H+		0.0886065	-0.108393
					C17--> C17QM + 2e- + 2H+		0.361226	0.164226
B3LYP/6-31+G(d,p)/SMD
		Gaq
	Compound	au	kcal/mol		Reaction	pKa	E°ox (SHE)	E°ox (Ag/AgCl)
	C17	-1406.75	-882748
	C17+.	-1406.56	-882630		C17 --> C17+. + e-		0.773645	0.576645
	C172+	-1406.34	-882494		C17+.--> C172+ + e-		1.60507	1.40807
DESDE C6-OH	C17.	-1406.13	-882362		C17+.--> C17. + H+	-1.17787
	C17+	-1405.94	-882239		C172+--> C17+ + H+	-11.3237
	C17C3.-	-1405.68	-882076		C17.--> C17+ + e-		1.00513	0.808134
	C17QM	-1405.54	-881988		C17.--> C17C3.- + H+	11.6491
					C17+--> C17QM + H+	-13.9408
					C17C3.---> C17QM + e-		-0.508021	-0.705021
				E°ox1 < E°ox2	C17--> C17+. + e- + H+		0.703997	0.506997
					C17+.--> C17QM + e- + H+		0.180799	-0.0162006
					C17--> C17QM + 2e- + 2H+		0.442398	0.245398

## Sheet: Oxidation III pH=4
B3LYP/6-31+G(d,p)/SMD multi explicit water molecules
		Gaq										Termodinamic constants
	Compound	au	kcal/mol		Reaction	pKa	E°ox (SHE)	E°ox (Ag/AgCl)
	C172	-1864.91	-1.17025e+06									R	0.00198588
	C172.	-1864.74	-1.17014e+06		C172 --> C172. + e-		0.425092	0.228092				T	298.15
	C172+	-1864.54	-1.17002e+06		C172.--> C172+ + e-		1.10712	0.910123				ΔG(aq)H+	-270.29
DESDE C6-OH	C172.-	-1864.3	-1.16987e+06		C172.--> C172.- + H+	3.03473						SHE	4.281
	C1720	-1864.12	-1.16975e+06		C172+--> C1720 + H+	-4.17418						F	23.0604
	C172QM.2-	-1863.84	-1.16958e+06		C172.---> C1720 + e-		0.680854	0.483854				Ggas e	-0.867
	C172QM	-1863.71	-1.1695e+06		C172.---> C172QM.2- + H+	13.7098						1/2.303RT	0.733362
					C1720--> C172QM + H+	-10.2671						(atm->m/l)	1.89
					C172QM.2---> C172QM + e-		-0.736925	-0.933925				Ggas e/F	-0.037597
												SHE+G(e-)	4.3186
				E°ox1 < E°ox2	C172--> C172.- + e- + H+		0.604538	0.407538				SHE -> Ag/AgCl	0.197
				pka	C172.---> C172QM + e- + H+		0.073749	-0.123251
					C172--> C172QM + 2e- + 2H+		0.339144	0.142144
B3LYP/6-31+G(d,p)/SMD
		Gaq
	Compound	au	kcal/mol		Reaction	pKa	E°ox (SHE)	E°ox (Ag/AgCl)
	C172	-1406.31	-882474
	C172.	-1406.13	-882359		C172 --> C172. + e-		0.645724	0.448724
	C172+	-1405.92	-882227		C172.--> C172+ + e-		1.41244	1.21544
DESDE C6-OH	C172.-	-1405.7	-882088		C172.--> C172.- + H+	0.761381
	C1720	-1405.51	-881968		C172+--> C1720 + H+	-8.17923
	C172QM.2-	-1405.24	-881801		C172.---> C1720 + e-		0.883771	0.686771
	C172QM	-1405.1	-881716		C172.---> C172QM.2- + H+	12.0227
					C1720--> C172QM + H+	-13.5727
					C172QM.2---> C172QM + e-		-0.629711	-0.826711
				E°ox1 < E°ox2	C172--> C172.- + e- + H+		0.690745	0.493745
					C172.---> C172QM + e- + H+		0.081205	-0.115795
					C172--> C172QM + 2e- + 2H+		0.385975	0.188975
B3LYP/6-31+G(d,p)/SMD multi explicit water molecules
		Gaq
	Compound	au	kcal/mol		Reaction	pKa	E°ox (SHE)	E°ox (Ag/AgCl)
	C1715	-1864.91	-1.17025e+06
	C1715.	-1864.74	-1.17014e+06		C1715 --> C1715. + e-		0.460685	0.263685
	C1715+	-1864.53	-1.17001e+06		C1715.--> C1715+ + e-		1.2422	1.0452
DESDE C6-OH	C1715.-	-1864.3	-1.16987e+06		C1715.--> C1715.- + H+	2.64909
	C17150	-1864.12	-1.16975e+06		C1715+--> C17150 + H+	-5.36884
	C1715QM.2-	-1863.84	-1.16958e+06		C1715.---> C17150 + e-		0.768094	0.571094
	C1715QM	-1863.71	-1.1695e+06		C1715.---> C1715QM.2- + H+	15.7011
					C17150--> C1715QM + H+	-11.1493
					C1715QM.2---> C1715QM + e-		-0.819594	-1.01659
				E°ox1 < E°ox2	C1715--> C1715.- + e- + H+		0.617328	0.420328
				pka	C1715.---> C1715QM + e- + H+		0.108825	-0.0881753
					C1715--> C1715QM + 2e- + 2H+		0.363076	0.166076
B3LYP/6-31+G(d,p)/SMD
		Gaq
	Compound	au	kcal/mol		Reaction	pKa	E°ox (SHE)	E°ox (Ag/AgCl)
	C1715	-1406.31	-882473
	C1715.	-1406.13	-882358		C1715 --> C1715. + e-		0.653697	0.456697
	C1715+	-1405.91	-882224		C1715.--> C1715+ + e-		1.5187	1.3217
DESDE C6-OH	C1715.-	-1405.7	-882087		C1715.--> C1715.- + H+	0.49539
	C17150	-1405.5	-881967		C1715+--> C17150 + H+	-9.7494
	C1715QM.2-	-1405.23	-881798		C1715.---> C17150 + e-		0.912914	0.715914
	C1715QM	-1405.1	-881715		C1715.---> C1715QM.2- + H+	13.8069
					C17150--> C1715QM + H+	-13.3403
					C1715QM.2---> C1715QM + e-		-0.692325	-0.889325
				E°ox1 < E°ox2	C1715--> C1715.- + e- + H+		0.682989	0.485989
					C1715.---> C1715QM + e- + H+		0.12409	-0.0729096
					C1715--> C1715QM + 2e- + 2H+		0.40354	0.20654

## Sheet: Oxidation III pH=5
B3LYP/6-31+G(d,p)/SMD multi explicit water molecules
		Gaq										Termodinamic constants
	Compound	au	kcal/mol		Reaction	pKa	E°ox (SHE)	E°ox (Ag/AgCl)
	C17215	-1864.47	-1.16998e+06									R	0.00198588
	C17215.-	-1864.3	-1.16987e+06		C17215 --> C17215.- + e-		0.338287	0.141287				T	298.15
	C172150	-1864.1	-1.16974e+06		C17215.---> C172150 + e-		1.15749	0.960492				ΔG(aq)H+	-270.29
DESDE C6-OH	C17215.2-	-1863.86	-1.16959e+06		C17215.---> C17215.2- + H+	3.70017						SHE	4.281
	C172151-	-1863.68	-1.16948e+06		C172150--> C172151- + H+	-5.03428						F	23.0604
	C17215QM.3-	-1863.4	-1.1693e+06		C17215.2---> C172151- + e-		0.641016	0.444016				Ggas e	-0.867
	C17215QM	-1863.27	-1.16922e+06		C17215.2---> C17215QM.3- + H+	15.8612						1/2.303RT	0.733362
					C172151---> C17215QM + H+	-9.66381						(atm->m/l)	1.89
					C17215QM.3---> C17215QM + e-		-0.868302	-1.0653				Ggas e/F	-0.037597
												SHE+G(e-)	4.3186
				E°ox1 < E°ox2	C17215--> C17215.2- + e- + H+		0.557081	0.360081				SHE -> Ag/AgCl	0.197
				pka	C17215.2---> C17215QM + e- + H+		0.0695856	-0.127414
					C17215--> C17215QM + 2e- + 2H+		0.313333	0.116333
B3LYP/6-31+G(d,p)/SMD
		Gaq
	Compound	au	kcal/mol		Reaction	pKa	E°ox (SHE)	E°ox (Ag/AgCl)
	C17215	-1405.87	-882198
	C17215.-	-1405.69	-882085		C17215 --> C17215.- + e-		0.559925	0.362925
	C172150	-1405.49	-881955		C17215.---> C172150 + e-		1.32454	1.12754
DESDE C6-OH	C17215.2-	-1405.26	-881813		C17215.---> C17215.2- + H+	1.69051
	C172151-	-1405.07	-881695		C172150--> C172151- + H+	-7.37619
	C17215QM.3-	-1404.8	-881524		C17215.2---> C172151- + e-		0.788421	0.591421
	C17215QM	-1404.67	-881442		C17215.2---> C17215QM.3- + H+	13.7926
					C172151---> C17215QM + H+	-12.4029
					C17215QM.3---> C17215QM + e-		-0.760545	-0.957545
				E°ox1 < E°ox2	C17215--> C17215.2- + e- + H+		0.659887	0.462887
					C17215.2---> C17215QM + e- + H+		0.0550274	-0.141973
					C17215--> C17215QM + 2e- + 2H+		0.357457	0.160457

## Sheet: Oxidation III pH=8
B3LYP/6-31+G(d,p)/SMD multi explicit water molecules
		Gaq										Termodinamic constants
	Compound	au	kcal/mol		Reaction	pKa	E°ox (SHE)	E°ox (Ag/AgCl)
	C17215OH6	-1864.02	-1.16969e+06									R	0.00198588
	C17215.2-	-1863.86	-1.16959e+06		C17215OH6 --> C17215.2- + e-		-0.0348385	-0.231838				T	298.15
	C17215-	-1863.68	-1.16948e+06		C17215.2---> C17215- + e-		0.641016	0.444016				ΔG(aq)H+	-270.29
DESDE C6-OH	C17215QM.3-	-1863.4	-1.1693e+06		C17215.2---> C17215QM.3- + H+	15.8612						SHE	4.281
	C17215QM	-1863.27	-1.16922e+06		C17215---> C17215QM + H+	-9.66381						F	23.0604
												Ggas e	-0.867
												1/2.303RT	0.733362
												(atm->m/l)	1.89
					C17215QM.3---> C17215QM + e-		-0.868302	-1.0653				Ggas e/F	-0.037597
												SHE+G(e-)	4.3186
				E°ox1 > E°ox2	C17215OH6--> C17215QM.3- + e- + H+		0.90305	0.70605				SHE -> Ag/AgCl	0.197
					C17215OH6--> C17215QM + 2e- + H+		0.0173736	-0.179626
B3LYP/6-31+G(d,p)/SMD
		Gaq
	Compound	au	kcal/mol		Reaction	pKa	E°ox (SHE)	E°ox (Ag/AgCl)
	C17215OH6	-1405.41	-881911
	C17215.2-	-1405.26	-881813		C17215OH6 --> C17215.2- + e-		-0.0690163	-0.266016
	C17215-	-1405.07	-881695		C17215.2---> C17215- + e-		0.788421	0.591421
DESDE C6-OH	C17215QM.3-	-1404.8	-881524		C17215.2---> C17215QM.3- + H+	13.7926
	C17215QM	-1404.67	-881442		C17215---> C17215QM + H+	-12.4029
					C17215QM.3---> C17215QM + e-		-0.760545	-0.957545
					C17215OH6--> C17215QM.3- + e- + H+		0.746556	0.549556
				E°ox1 > E°ox2	C17215OH6--> C17215QM + 2e- + H+		-0.00699442	-0.203994
