# Supplementary material for: Study of the electrochemical betanidin oxidation path using computational methods
Source: Royal Society of Chemistry journal article supplement (doi:10.1039/d2cp02053j), 2022-01-01
Supplement: d2cp02053j3.xlsx [file d2cp02053j3.xlsx]

## Sheet: OxidationIII pH=0
B3LYP/6-31+G(d,p)/SMD multi explicit water molecules
		Gaq										Termodinamic constants
	Compound	au	kcal/mol		Reaction	pKa	E°ox (SHE)	E°ox (Ag/AgCl)
	1	-1865.79	-1.1708e+06									R	0.00198588
	12+.	-1865.61	-1.17069e+06		1 --> 12+. + e-		0.642404	0.445404				T	298.15
	13+	-1865.4	-1.17056e+06		12+.--> 13+ + e-		1.26873	1.07173				ΔG(aq)H+	-270.29
DESDE C6-OH	1+.	-1865.18	-1.17042e+06		12+.--> 1+. + H+	0.23308						SHE	4.281
	12+	-1864.99	-1.1703e+06		13+--> 12+ + H+	-6.67348						F	23.0604
	1.	-1864.74	-1.17014e+06		1+.--> 12+ + e-		0.860341	0.663341				Ggas e	-0.867
	12	-1864.57	-1.17004e+06		1+.--> 1. + H+	3.64448						1/2.303RT	0.733362
					12+--> 12 + H+	-8.63482						(atm->m/l)	1.89
					1.--> 12 + e-		0.134254	-0.0627456				Ggas e/F	-0.037597
												SHE+G(e-)	4.3186
					1--> 1+. + e- + H+		0.656186	0.459186				SHE to Ag/AgCl	0.197
					1+.--> 12 + e- + H+		0.349756	0.152756
					1--> 12 + 2e- + 2H+		0.502971	0.305971
B3LYP/6-31+G(d,p)/SMD multi explicit water molecules
		Gaq
	Compound	au	kcal/mol		Reaction	pKa	E°ox (SHE)	E°ox (Ag/AgCl)
	1	-1865.79	-1.1708e+06
	12+.	-1865.61	-1.17069e+06		1 --> 12+. + e-		0.642404	0.445404
	13+	-1865.4	-1.17056e+06		12+.--> 13+ + e-		1.26873	1.07173
DESDE C5-OH	1+.	-1865.18	-1.17042e+06		12+.--> 1+. + H+	-1.10884
	12+	-1864.99	-1.1703e+06		13+--> 12+ + H+	-10.9385
	1.	-1864.74	-1.17014e+06		1+.--> 12+ + e-		0.687493	0.490493
	12	-1864.57	-1.17004e+06		1+.--> 1. + H+	4.9864
					12+--> 12 + H+	-4.36976
					1.--> 12 + e-		0.134254	-0.0627456
					1--> 1+. + e- + H+		0.576837	0.379837
					1+.--> 12 + e- + H+		0.429105	0.232105
					1--> 12 + 2e- + 2H+		0.502971	0.305971
					DG 1OH5.+ -> 1OH6.+	1.82982
					Keq 1OH5.+ -> 1OH6.+	0.0454819
B3LYP/6-31+G(d,p)/SMD
		Gaq
	Compound	au	kcal/mol		Reaction	pKa	E°ox (SHE)	E°ox (Ag/AgCl)
	1	-1407.18	-883020
	12+.	-1406.99	-882897		1 --> 12+. + e-		0.997814	0.800814
	13+	-1406.76	-882758		12+.--> 13+ + e-		1.71054	1.51354
DESDE C6-OH	1+.	-1406.56	-882631		12+.--> 1+. + H+	-3.35596
	12+	-1406.36	-882506		13+--> 12+ + H+	-13.4576
	1.	-1406.12	-882356		1+.--> 12+ + e-		1.11322	0.916219
	12	-1405.96	-882251		1+.--> 1. + H+	3.9818
					12+--> 12 + H+	-11.3661
					1.--> 12 + e-		0.205685	0.00868482
					1--> 1+. + e- + H+		0.799373	0.602373
					1+.--> 12 + e- + H+		0.441133	0.244133
					1--> 12 + 2e- + 2H+		0.620253	0.423253
B3LYP/6-31+G(d,p)/SMD
		Gaq
	Compound	au	kcal/mol		Reaction	pKa	E°ox (SHE)	E°ox (Ag/AgCl)
	1	-1407.18	-883020
	12+.	-1406.99	-882897		1 --> 12+. + e-		0.997814	0.800814
	13+	-1406.76	-882758		12+.--> 13+ + e-		1.71054	1.51354
DESDE C5-OH	1+.	-1406.56	-882631		12+.--> 1+. + H+	-3.09549
	12+	-1406.37	-882511		13+--> 12+ + H+	-17.3964
	1.	-1406.12	-882356		1+.--> 12+ + e-		0.864913	0.667913
	12	-1405.96	-882251		1+.--> 1. + H+	3.72134
					12+--> 12 + H+	-7.42727
					1.--> 12 + e-		0.205685	0.00868482
					1--> 1+. + e- + H+		0.814775	0.617775
					1+.--> 12 + e- + H+		0.425731	0.228731
					1--> 12 + 2e- + 2H+		0.620253	0.423253
					DG 1OH5.+ -> 1OH6.+	-0.35517
					Keq 1OH5.+ -> 1OH6.+	1.82186

## Sheet: OxidationIII pH=1.6
B3LYP/6-31+G(d,p)/SMD multi explicit water molecules
		Gaq										Termodinamic constants
	Compound	au	kcal/mol		Reaction	pKa	E°ox (SHE)	E°ox (Ag/AgCl)
	C17	-1865.35	-1.17053e+06									R	0.00198588
	C17+.	-1865.18	-1.17042e+06		C17 --> C17+. + e-		0.524496	0.327496				T	298.15
	C172+	-1864.97	-1.17029e+06		C17+.--> C172+ + e-		1.21962	1.02262				ΔG(aq)H+	-270.29
DESDE C6-OH	C17.	-1864.74	-1.17014e+06		C17+.--> C17. + H+	1.84927						SHE	4.281
	C17+	-1864.55	-1.17003e+06		C172+--> C17+ + H+	-6.01633						F	23.0604
	C17.-	-1864.3	-1.16987e+06		C17.--> C17+ + e-		0.754516	0.557516				Ggas e	-0.867
	C17Q	-1864.14	-1.16977e+06		C17.--> C17.- + H+	4.24411						1/2.303RT	0.733362
					C17+--> C17Q + H+	-7.46271						(atm->m/l)	1.89
					C17.---> C17Q + e-		0.0622797	-0.13472				Ggas e/F	-0.037597
												SHE+G(e-)	4.3186
				E°ox1 < E°ox2	C17--> C17+. + e- + H+		0.633845	0.436845				SHE to Ag/AgCl	0.197
					C17+.--> C17Q + e- + H+		0.313238	0.116238
					C17--> C17Q + 2e- + 2H+		0.473542	0.276542
B3LYP/6-31+G(d,p)/SMD multi explicit water molecules
		Gaq
	Compound	au	kcal/mol		Reaction	pKa	E°ox (SHE)	E°ox (Ag/AgCl)
	C17	-1865.35	-1.17053e+06
	C17+.	-1865.18	-1.17042e+06		C17 --> C17+. + e-		0.524496	0.327496
	C172+	-1864.97	-1.17029e+06		C17+.--> C172+ + e-		1.21962	1.02262
DESDE C5-OH	C17.	-1864.74	-1.17014e+06		C17+.--> C17. + H+	1.25747
	C17+	-1864.56	-1.17003e+06		C172+--> C17+ + H+	-9.16634
	C17.-	-1864.3	-1.16987e+06		C17.--> C17+ + e-		0.603246	0.406246
	C17Q	-1864.14	-1.16977e+06		C17.--> C17.- + H+	4.83592
					C17+--> C17Q + H+	-4.3127
					C17.---> C17Q + e-		0.0622797	-0.13472
				E°ox1 < E°ox2	C17--> C17. + e- + H+		0.598851	0.401851
					C17.--> C17Q + e- + H+		0.348232	0.151232
					C17--> C17Q + 2e- + 2H+		0.473542	0.276542
					DG 1OH5.+ -> 1OH6.+	0.806977
					Keq 1OH5.+ -> 1OH6.+	0.25591
B3LYP/6-31+G(d,p)/SMD
		Gaq
	Compound	au	kcal/mol		Reaction	pKa	E°ox (SHE)	E°ox (Ag/AgCl)
	C17	-1406.75	-882748
	C17+.	-1406.56	-882630		C17 --> C17+. + e-		0.773645	0.576645
	C172+	-1406.34	-882494		C17+.--> C172+ + e-		1.60507	1.40807
DESDE C6-OH	C17.	-1406.13	-882362		C17+.--> C17. + H+	-1.17787
	C17+	-1405.94	-882239		C172+--> C17+ + H+	-11.3237
	C17.-	-1405.69	-882083		C17.--> C17+ + e-		1.00513	0.808134
	C17Q	-1405.53	-881983		C17.--> C17.- + H+	6.00067
					C17+--> C17Q + H+	-10.5888
					C17.---> C17Q + e-		0.0241835	-0.172817
				E°ox1 < E°ox2	C17--> C17+. + e- + H+		0.703997	0.506997
					C17+.--> C17Q + e- + H+		0.379009	0.182009
					C17--> C17Q + 2e- + 2H+		0.541503	0.344503
B3LYP/6-31+G(d,p)/SMD
		Gaq
	Compound	au	kcal/mol		Reaction	pKa	E°ox (SHE)	E°ox (Ag/AgCl)
	C17	-1406.75	-882748
	C17+.	-1406.56	-882630		C17 --> C17+. + e-		0.773645	0.576645
	C172+	-1406.34	-882494		C17+.--> C172+ + e-		1.60507	1.40807
DESDE C5-OH	C17.	-1406.13	-882362		C17+.--> C17. + H+	-0.996552
	C17+	-1405.95	-882245		C172+--> C17+ + H+	-15.5372
	C17.-	-1405.69	-882083		C17.--> C17+ + e-		0.745264	0.548264
	C17Q	-1405.53	-881983		C17.--> C17.- + H+	5.81935
					C17+--> C17Q + H+	-6.37528
					C17.---> C17Q + e-		0.0241835	-0.172817
					C17--> C17+. + e- + H+		0.714718	0.517718
					C17+.--> C17Q + e- + H+		0.368287	0.171287
				E°ox1 > E°ox2	C17--> C17Q + 2e- + 2H+		0.541503	0.344503
					DG 1OH5.+ -> 1OH6.+	-0.247239
					Keq 1OH5.+ -> 1OH6.+	1.51827

## Sheet: Oxidation III pH=4
B3LYP/6-31+G(d,p)/SMD multi explicit water molecules
		Gaq										Termodinamic constants
	Compound	au	kcal/mol		Reaction	pKa	E°ox (SHE)	E°ox (Ag/AgCl)
	C172	-1864.91	-1.17025e+06									R	0.00198588
	C172.	-1864.74	-1.17014e+06		C172 --> C172. + e-		0.425092	0.228092				T	298.15
	C172+	-1864.54	-1.17002e+06		C172.--> C172+ + e-		1.10712	0.910123				ΔG(aq)H+	-270.29
DESDE C6-OH	C172.-	-1864.3	-1.16987e+06		C172.--> C172.- + H+	3.03473						SHE	4.281
	C1720	-1864.12	-1.16975e+06		C172+--> C1720 + H+	-4.17418						F	23.0604
	C172.2-	-1863.86	-1.16959e+06		C172.---> C1720 + e-		0.680854	0.483854				Ggas e	-0.867
	C172Q	-1863.7	-1.16949e+06		C172.---> C172.2- + H+	6.14333						1/2.303RT	0.733362
					C1720--> C172Q + H+	-5.74573						(atm->m/l)	1.89
					C172.2---> C172Q + e-		-0.0221579	-0.219158				Ggas e/F	-0.037597
												SHE+G(e-)	4.3186
				E°ox1 < E°ox2	C172--> C172.- + e- + H+		0.604538	0.407538				SHE to Ag/AgCl	0.197
				pka	C172.---> C172Q + e- + H+		0.341103	0.144103
					C172--> C172Q + 2e- + 2H+		0.472821	0.275821
B3LYP/6-31+G(d,p)/SMD multi explicit water molecules
		Gaq
	Compound	au	kcal/mol		Reaction	pKa	E°ox (SHE)	E°ox (Ag/AgCl)
	C172	-1864.91	-1.17025e+06
	C172.	-1864.74	-1.17014e+06		C172 --> C172. + e-		0.425092	0.228092
	C172+	-1864.54	-1.17002e+06		C172.--> C172+ + e-		1.10712	0.910123
DESDE C5-OH	C172.-	-1864.3	-1.16987e+06		C172.--> C172.- + H+	2.49907
	C1720	-1864.13	-1.16976e+06		C172+--> C1720 + H+	-8.26022
	C172.2-	-1863.86	-1.16959e+06		C172.---> C1720 + e-		0.470916	0.273916
	C172Q	-1863.7	-1.16949e+06		C172.---> C172.2- + H+	6.67899
					C1720--> C172Q + H+	-1.65969
					C172.2---> C172Q + e-		-0.0221579	-0.219158
				E°ox1 < E°ox2	C172--> C172.- + e- + H+		0.572864	0.375864
				pKa	C172.---> C172Q + e- + H+		0.372777	0.175777
					C172--> C172Q + 2e- + 2H+		0.472821	0.275821
					DG 1OH5.+ -> 1OH6.+	0.730421
					Keq 1OH5.+ -> 1OH6.+	0.291233
B3LYP/6-31+G(d,p)/SMD
		Gaq
	Compound	au	kcal/mol		Reaction	pKa	E°ox (SHE)	E°ox (Ag/AgCl)
	C172	-1406.31	-882474
	C172.	-1406.13	-882359		C172 --> C172. + e-		0.645724	0.448724
	C172+	-1405.92	-882227		C172.--> C172+ + e-		1.41244	1.21544
DESDE C6-OH	C172.-	-1405.7	-882088		C172.--> C172.- + H+	0.761381
	C1720	-1405.51	-881968		C172+--> C1720 + H+	-8.17923
	C172.2-	-1405.25	-881808		C172.---> C1720 + e-		0.883771	0.686771
	C172Q	-1405.09	-881709		C172.---> C172.2- + H+	6.73835
					C1720--> C172Q + H+	-8.60905
					C172.2---> C172Q + e-		-0.0237362	-0.220736
				E°ox1 < E°ox2	C172--> C172.- + e- + H+		0.690745	0.493745
					C172.---> C172Q + e- + H+		0.374709	0.177709
					C172--> C172Q + 2e- + 2H+		0.532727	0.335727
B3LYP/6-31+G(d,p)/SMD
		Gaq
	Compound	au	kcal/mol		Reaction	pKa	E°ox (SHE)	E°ox (Ag/AgCl)
	C172	-1406.31	-882474
	C172.	-1406.13	-882359		C172 --> C172. + e-		0.645724	0.448724
	C172+	-1405.92	-882227		C172.--> C172+ + e-		1.41244	1.21544
DESDE C5-OH	C172.-	-1405.7	-882088		C172.--> C172.- + H+	0.872747
	C1720	-1405.51	-881974		C172+--> C1720 + H+	-12.6624
	C172.2-	-1405.25	-881808		C172.---> C1720 + e-		0.61209	0.41509
	C172Q	-1405.09	-881709		C172.---> C172.2- + H+	6.62699
					C1720--> C172Q + H+	-4.12586
					C172.2---> C172Q + e-		-0.0237362	-0.220736
					C172--> C172.- + e- + H+		0.69733	0.50033
					C172.---> C172Q + e- + H+		0.368124	0.171124
				E°ox1 > E°ox2	C172--> C172Q + 2e- + 2H+		0.532727	0.335727
					DG 1OH5.+ -> 1OH6.+	-0.151857
					Keq 1OH5.+ -> 1OH6.+	1.29237
B3LYP/6-31+G(d,p)/SMD multi explicit water molecules
		Gaq
	Compound	au	kcal/mol		Reaction	pKa	E°ox (SHE)	E°ox (Ag/AgCl)
	C1715	-1864.91	-1.17025e+06
	C1715.	-1864.74	-1.17014e+06		C1715 --> C1715. + e-		0.460685	0.263685
	C1715+	-1864.53	-1.17001e+06		C1715.--> C1715+ + e-		1.2422	1.0452
DESDE C6-OH	C1715.-	-1864.3	-1.16987e+06		C1715.--> C1715.- + H+	2.64909
	C17150	-1864.12	-1.16975e+06		C1715+--> C17150 + H+	-5.36884
	C1715.2-	-1863.86	-1.16959e+06		C1715.---> C17150 + e-		0.768094	0.571094
	C1715Q	-1863.7	-1.16949e+06		C1715.---> C1715.2- + H+	4.95511
					C17150--> C1715Q + H+	-9.01724
					C1715.2---> C1715Q + e-		-0.0581044	-0.255104
				E°ox1 < E°ox2	C1715--> C1715.- + e- + H+		0.617328	0.420328
				pka	C1715.---> C1715Q + e- + H+		0.234896	0.0378961
					C1715--> C1715Q + 2e- + 2H+		0.426112	0.229112
B3LYP/6-31+G(d,p)/SMD multi explicit water molecules
		Gaq
	Compound	au	kcal/mol		Reaction	pKa	E°ox (SHE)	E°ox (Ag/AgCl)
	C1715	-1864.91	-1.17025e+06
	C1715.	-1864.74	-1.17014e+06		C1715 --> C1715. + e-		0.460685	0.263685
	C1715+	-1864.53	-1.17001e+06		C1715.--> C1715+ + e-		1.2422	1.0452
DESDE C5-OH	C1715.-	-1864.3	-1.16987e+06		C1715.--> C1715.- + H+	2.26989
	C17150	-1864.13	-1.16976e+06		C1715+--> C17150 + H+	-10.8852
	C1715.2-	-1863.86	-1.16959e+06		C1715.---> C17150 + e-		0.464331	0.267331
	C1715Q	-1863.7	-1.16949e+06		C1715.---> C1715.2- + H+	5.33431
					C17150--> C1715Q + H+	-3.50092
					C1715.2---> C1715Q + e-		-0.0581044	-0.255104
				E°ox1 = E°ox2	C1715--> C1715.- + e- + H+		0.594905	0.397905
				pKa	C1715.---> C1715Q + e- + H+		0.257318	0.0603184
					C1715--> C1715Q + 2e- + 2H+		0.426112	0.229112
					DG 1OH5.+ -> 1OH6.+	0.517068
					Keq 1OH5.+ -> 1OH6.+	0.417574
B3LYP/6-31+G(d,p)/SMD
		Gaq
	Compound	au	kcal/mol		Reaction	pKa	E°ox (SHE)	E°ox (Ag/AgCl)
	C1715	-1406.31	-882473
	C1715.	-1406.13	-882358		C1715 --> C1715. + e-		0.653697	0.456697
	C1715+	-1405.91	-882224		C1715.--> C1715+ + e-		1.5187	1.3217
DESDE C6-OH	C1715.-	-1405.7	-882087		C1715.--> C1715.- + H+	0.49539
	C17150	-1405.5	-881967		C1715+--> C17150 + H+	-9.7494
	C1715.2-	-1405.25	-881808		C1715.---> C17150 + e-		0.912914	0.715914
	C1715Q	-1405.09	-881710		C1715.---> C1715.2- + H+	6.53863
					C17150--> C1715Q + H+	-9.66059
					C1715.2---> C1715Q + e-		-0.0449612	-0.241961
				E°ox1 < E°ox2	C1715--> C1715.- + e- + H+		0.682989	0.485989
					C1715.---> C1715Q + e- + H+		0.341674	0.144674
					C1715--> C1715Q + 2e- + 2H+		0.512332	0.315332
B3LYP/6-31+G(d,p)/SMD
		Gaq
	Compound	au	kcal/mol		Reaction	pKa	E°ox (SHE)	E°ox (Ag/AgCl)
	C1715	-1406.31	-882473
	C1715.	-1406.13	-882358		C1715 --> C1715. + e-		0.653697	0.456697
	C1715+	-1405.91	-882224		C1715.--> C1715+ + e-		1.5187	1.3217
DESDE C5-OH	C1715.-	-1405.7	-882087		C1715.--> C1715.- + H+	0.535426
	C17150	-1405.51	-881973		C1715+--> C17150 + H+	-14.2584
	C1715.2-	-1405.25	-881808		C1715.---> C17150 + e-		0.643928	0.446928
	C1715Q	-1405.09	-881710		C1715.---> C1715.2- + H+	6.49859
					C17150--> C1715Q + H+	-5.15163
					C1715.2---> C1715Q + e-		-0.0449612	-0.241961
					C1715--> C1715.- + e- + H+		0.685357	0.488357
					C1715.---> C1715Q + e- + H+		0.339307	0.142307
				E°ox1 = E°ox2	C1715--> C1715Q + 2e- + 2H+		0.512332	0.315332

## Sheet: Oxidation III pH=5
B3LYP/6-31+G(d,p)/SMD multi explicit water molecules
		Gaq										Termodinamic constants
	Compound	au	kcal/mol		Reaction	pKa	E°ox (SHE)	E°ox (Ag/AgCl)
	C17215	-1864.47	-1.16998e+06									R	0.00198588
	C17215.-	-1864.3	-1.16987e+06		C17215 --> C17215.- + e-		0.338287	0.141287				T	298.15
	C172150	-1864.1	-1.16974e+06		C17215.---> C172150 + e-		1.15749	0.960492				ΔG(aq)H+	-270.29
DESDE C6-OH	C17215.2-	-1863.86	-1.16959e+06		C17215.---> C17215.2- + H+	3.70017						SHE	4.281
	C172151-	-1863.68	-1.16948e+06		C172150--> C172151- + H+	-5.03428						F	23.0604
	C17215.3-	-1863.42	-1.16931e+06		C17215.2---> C172151- + e-		0.641016	0.444016				Ggas e	-0.867
	C17215Q	-1863.26	-1.16922e+06		C17215.2---> C17215.3- + H+	5.87733						1/2.303RT	0.733362
					C172151---> C17215Q + H+	-6.16773						(atm->m/l)	1.89
					C17215.3---> C17215Q + e-		-0.0712204	-0.26822				Ggas e/F	-0.037597
												SHE+G(e-)	4.3186
				E°ox1 < E°ox2	C17215--> C17215.2- + e- + H+		0.557081	0.360081				SHE to Ag/AgCl	0.197
				pka	C17215.2---> C17215Q + e- + H+		0.276312	0.0793121
					C17215--> C17215Q + 2e- + 2H+		0.416697	0.219697
B3LYP/6-31+G(d,p)/SMD multi explicit water molecules
		Gaq
	Compound	au	kcal/mol		Reaction	pKa	E°ox (SHE)	E°ox (Ag/AgCl)
	C17215	-1864.47	-1.16998e+06
	C17215.-	-1864.3	-1.16987e+06		C17215 --> C17215.- + e-		0.338287	0.141287
	C172150	-1864.1	-1.16974e+06		C17215.---> C172150 + e-		1.15749	0.960492
DESDE C5-OH	C17215.2-	-1863.86	-1.16959e+06		C17215.---> C17215.2- + H+	3.79313
	C172151-	-1863.69	-1.16948e+06		C172150--> C172151- + H+	-10.0209
	C17215.3-	-1863.42	-1.16931e+06		C17215.2---> C172151- + e-		0.340654	0.143654
	C17215Q	-1863.26	-1.16922e+06		C17215.2---> C17215.3- + H+	5.78438
					C172151---> C17215Q + H+	-1.18109
					C17215.3---> C17215Q + e-		-0.0712204	-0.26822
				E°ox1 = E°ox2	C17215--> C17215.2- + e- + H+		0.562578	0.365578
				pKa	C17215.2---> C17215Q + e- + H+		0.270815	0.0738154
					C17215--> C17215Q + 2e- + 2H+		0.416697	0.219697
					DG 1OH5.+ -> 1OH6.+	-0.126757
					Keq 1OH5.+ -> 1OH6.+	1.23873
B3LYP/6-31+G(d,p)/SMD
		Gaq
	Compound	au	kcal/mol		Reaction	pKa	E°ox (SHE)	E°ox (Ag/AgCl)
	C17215	-1405.87	-882198
	C17215.-	-1405.69	-882085		C17215 --> C17215.- + e-		0.559925	0.362925
	C172150	-1405.49	-881955		C17215.---> C172150 + e-		1.32454	1.12754
DESDE C6-OH	C17215.2-	-1405.26	-881813		C17215.---> C17215.2- + H+	1.69051
	C172151-	-1405.07	-881695		C172150--> C172151- + H+	-7.37619
	C17215.3-	-1404.81	-881532		C17215.2---> C172151- + e-		0.788421	0.591421
	C17215Q	-1404.66	-881435		C17215.2---> C17215.3- + H+	7.57958
					C172151---> C17215Q + H+	-7.90495
					C17215.3---> C17215Q + e-		-0.127195	-0.324195
				E°ox1 < E°ox2	C17215--> C17215.2- + e- + H+		0.659887	0.462887
					C17215.2---> C17215Q + e- + H+		0.320994	0.123994
					C17215--> C17215Q + 2e- + 2H+		0.49044	0.29344
B3LYP/6-31+G(d,p)/SMD
		Gaq
	Compound	au	kcal/mol		Reaction	pKa	E°ox (SHE)	E°ox (Ag/AgCl)
	C17215	-1405.87	-882198
	C17215.-	-1405.69	-882085		C17215 --> C17215.- + e-		0.559925	0.362925
	C172150	-1405.49	-881955		C17215.---> C172150 + e-		1.32454	1.12754
DESDE C5-OH	C17215.2-	-1405.26	-881813		C17215.---> C17215.2- + H+	1.61596
	C172151-	-1405.08	-881701		C172150--> C172151- + H+	-11.9832
	C17215.3-	-1404.81	-881532		C17215.2---> C172151- + e-		0.520414	0.323414
	C17215Q	-1404.66	-881435		C17215.2---> C17215.3- + H+	7.65414
					C172151---> C17215Q + H+	-3.29797
					C17215.3---> C17215Q + e-		-0.127195	-0.324195
					C17215--> C17215.2- + e- + H+		0.655479	0.458479
					C17215.2---> C17215Q + e- + H+		0.325402	0.128402
				E°ox1 < E°ox2	C17215--> C17215Q + 2e- + 2H+		0.49044	0.29344
					DG 1OH5.+ -> 1OH6.+	0.101657
					Keq 1OH5.+ -> 1OH6.+	0.842239

## Sheet: Oxidation III pH=8
B3LYP/6-31+G(d,p)/SMD multi explicit water molecules
		Gaq										Termodinamic constants
	Compound	au	kcal/mol		Reaction	pKa	E°ox (SHE)	E°ox (Ag/AgCl)
	C17215OH6	-1864.02	-1.16969e+06									R	0.00198588
	C17215.2-	-1863.86	-1.16959e+06		C17215OH6 --> C17215.2- + e-		-0.0348385	-0.231838				T	298.15
	C17215-	-1863.68	-1.16948e+06		C17215.2---> C17215- + e-		0.641016	0.444016				ΔG(aq)H+	-270.29
DESDE C6-OH	C17215.3-	-1863.42	-1.16931e+06		C17215.2---> C17215.3- + H+	5.87733						SHE	4.281
	C17215Q	-1863.26	-1.16922e+06		C17215---> C17215Q + H+	-6.16773						F	23.0604
												Ggas e	-0.867
												1/2.303RT	0.733362
												(atm->m/l)	1.89
					C17215.3---> C17215Q + e-		-0.0712204	-0.26822				Ggas e/F	-0.037597
												SHE+G(e-)	4.3186
				E°ox1 > E°ox2	C17215OH6--> C17215.3- + e- + H+		0.312694	0.115694				SHE to Ag/AgCl	0.197
					C17215OH6--> C17215Q + 2e- + H+		0.120737	-0.0762632
B3LYP/6-31+G(d,p)/SMD
		Gaq
	Compound	au	kcal/mol		Reaction	pKa	E°ox (SHE)	E°ox (Ag/AgCl)
	C17215OH6	-1405.41	-881911
	C17215.2-	-1405.26	-881813		C17215OH6 --> C17215.2- + e-		-0.0690163	-0.266016
	C17215-	-1405.07	-881695		C17215.2---> C17215- + e-		0.788421	0.591421
DESDE C6-OH	C17215.3-	-1404.81	-881532		C17215.2---> C17215.3- + H+	7.57958
	C17215Q	-1404.66	-881435		C17215---> C17215Q + H+	-7.90495
					C17215.3---> C17215Q + e-		-0.127195	-0.324195
					C17215OH6--> C17215.3- + e- + H+		0.379172	0.182172
				E°ox1 > E°ox2	C17215OH6--> C17215Q + 2e- + H+		0.125989	-0.0710113
