# Supplementary material for: Study of the electrochemical betanidin oxidation path using computational methods
Source: Royal Society of Chemistry journal article supplement (doi:10.1039/d2cp02053j), 2022-01-01
Supplement: d2cp02053j4.pdf [file d2cp02053j4.pdf]

**STUDY OF ELECTROCHEMICAL BETANIDIN OXIDATION PATH USING  
COMPUTATIONAL METHODS**

Edgardo Maximiliano Gavilán-Arriazu<sup>1</sup> and Sergio A. Rodríguez<sup>2\*</sup>

*<sup>1</sup> Facultad de Matemática, Astronomía y Física, IFEG-CONICET, Universidad Nacional de Córdoba, Córdoba, X5000, Argentina.*

*<sup>2</sup> CONICET, Instituto de Ciencias Químicas, FAYA, UNSE, Av. Belgrano Sur 1912, Santiago del Estero (4200), Argentina. Corresponding author: drsergiorod@gmail.com*

Submitted to:

***PCCP***

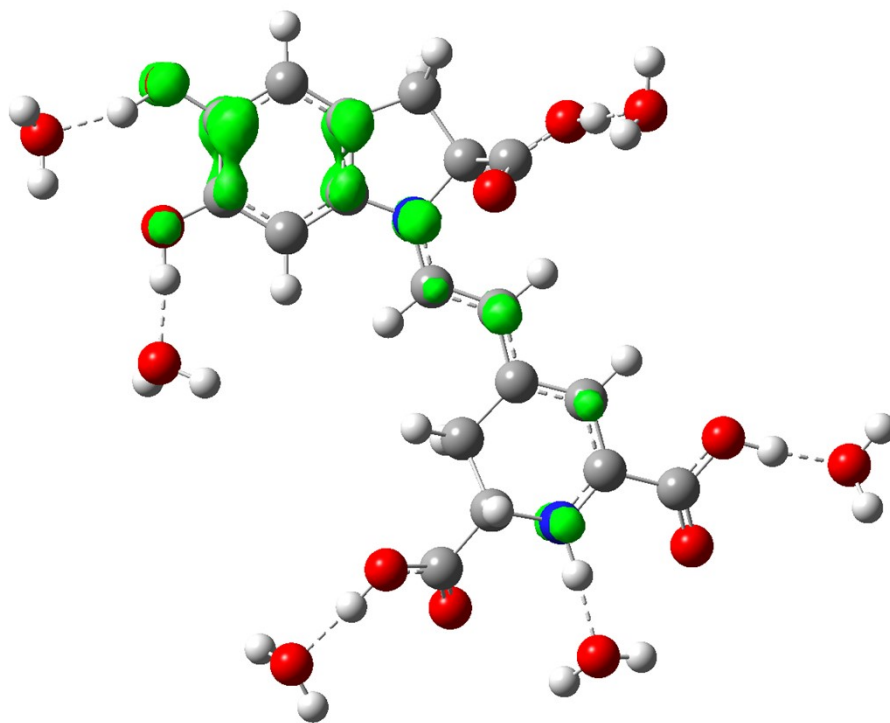

**Figure S1.** Spin density of 12+. (Isovalue=0.02, density=0.04).

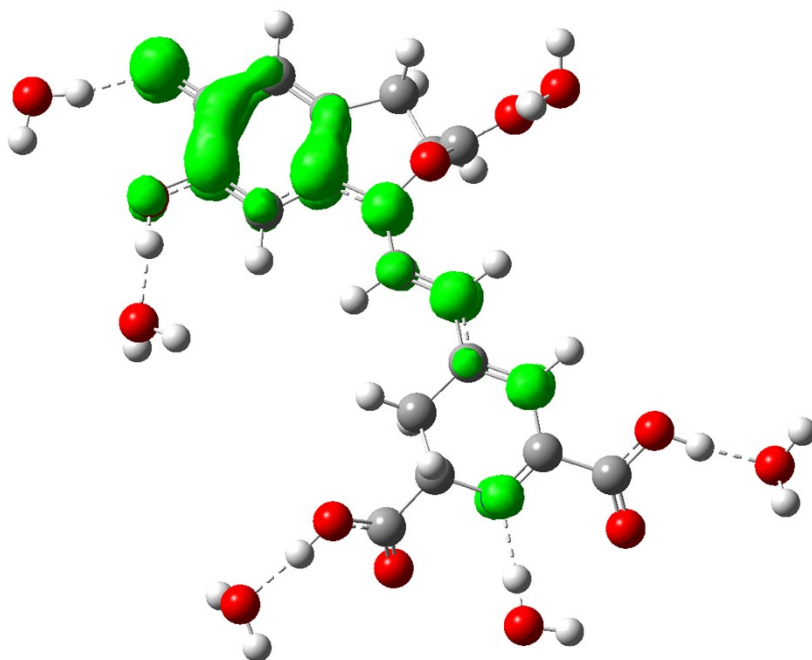

**Figure S2.** Spin density of 2. Isovalue=0.02, density=0.04.

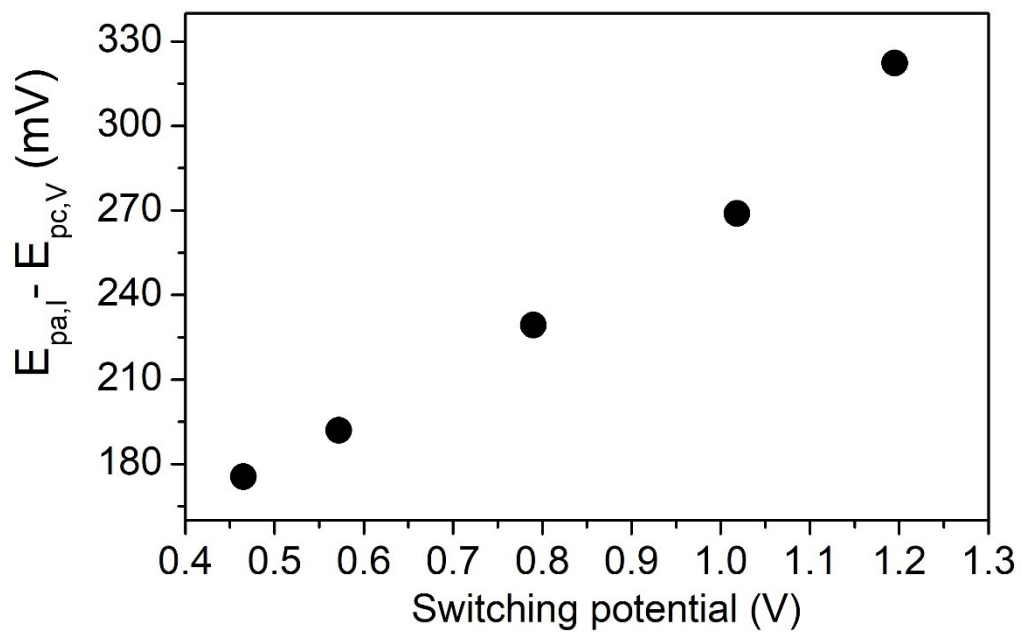

**Figure S3.** Influence of switching potential on the difference of peak potentials  $E_{pa,I}$  and  $E_{pc,V}$ . Experimental points were extracted from<sup>12</sup> with WebPlotDigitalizer<sup>30</sup>.
